# Supplementary material
Source: publisher figshare collection journal article supplement (https://geolsoc.figshare.com/ndownloader/files/22475888)
Supplement: Supplementary file 1 [file 22475888]

## Sheet: at11
T=949	cpx-all-av		opx-all-av						cpx-av	opx-av		No.	137	138	160	159	4	5	6	7	55	56
									rim	rim		Comment	at11 2-22	at11 2-23	at11 2-45	at11 2-44	at11 7-4	at11 7-5	at11 7-6	at11 7-7	at11 8-3	at11 8-4
	cpx		opx		ol		ilm						cpx	opx	cpx	opx
SiO2	51.3412		54.6249		38.7959		0.030625		51.1613	54.327		SiO2	51.608	54.187	51.075	54.05	50.723	54.544	50.876	54.734	52.543	55.072
TiO2	0.608688		0.308455		0.0246667		51.5609		0.641586	0.283231		TiO2	0.387	0.151	0.655	0.441	0.451	0.247	0.424	0.288	0.333	0.281
Al2O3	2.65909		1.44559		0.00859259		0.142625		2.65086	1.417		Al2O3	2.169	1.408	2.673	1.873	2.879	1.179	3.143	1.183	1.583	1.673
Cr2O3	0.343		0.1015		0.00944444		0.786875		0.329862	0.111231		Cr2O3	0.22	0.104	0.196	0.102	0.609	0.102	0.791	0.135	0.168	0.171
FeO	5.07734		11.0893		17.86		44.1945		5.11024	11.012		FeO	4.752	11.184	5.254	11.396	4.908	11.24	4.78	10.372	4.83	10.569
MnO	0.137969		0.262364		0.276778		1.32575		0.141724	0.2605		MnO	0.121	0.24	0.192	0.352	0.133	0.146	0.136	0.245	0.1	0.227
NiO	0.0200625		0.0160909		0.0507037		0.00225		0.0171724	0.0111923		NiO	0.03	0	0	0.005	0	0	0.013	0	0	0.005
MgO	16.5043		30.2224		42.188		1.839		16.4435	30.1202		MgO	15.93	30.27	16.549	29.979	16.967	29.864	16.595	29.147	16.644	30.094
CaO	22.3227		1.01759		0.129		0.016125		22.4659	1.10415		CaO	22.978	0.915	22.82	1.113	22.507	1.405	22.687	2.785	22.943	1.051
Na2O	0.322		0.0177727		0.00278571		0.015625		0.329379	0.0222692		Na2O	0.408	0.041	0.269	0.017	0.335	0.02	0.292	0.071	0.4	0.023
K2O	0.00225		0.00209091		0.000571429		0					K2O	0	0	0.008	0	0.003	0	0	0	0.002	0
Total	99.4005		99.1667		99.3661		99.9567		99.3661	98.7511		Total	98.813	98.544	99.874	99.339	99.641	98.767	99.789	99.044	99.553	99.212
	T (K)									T (K)				T (K)		T (K)		T (K)		T (K)		T (K)		av	std dv
T(BKN)	1157.41									1136.23				1014.01		1106.8		1133.74		1148.11		1090.32
	T(C)									T(C)				T(C)		T(C)		T(C)		T(C)		T(C)
	884.259									863.077				740.859		833.653		860.592		874.958		817.171		825.447	46.8562
	T(K)									T(K)				T(K)		T(K)		T(K)		T(K)		T(K)
T(Ca/opx)	1314.34									1337.04				1289.16		1338.11		1404.75		1639.74		1373.8
	T(C)									T(C)				T(C)		T(C)		T(C)		T(C)		T(C)
	1041.19									1063.89				1016.01		1064.96		1131.6		1366.59		1100.65		1135.96	121.561
T(Na/opx/cpx)	T(K)									T(K)				T(K)		T(K)		T(K)		T(K)		T(K)
	1253.65									1307.36				1410.29		1289.25		1275.26		1627.01		1285.9
	T(C)									T(C)				T(C)		T(C)		T(C)		T(C)		T(C)
	980.495									1034.21				1137.14		1016.1		1002.11		1353.86		1012.75		1104.39	134.137
QUILF									QUILF
2px	1019								2px	1038
	uncnt 5									uncnt 0
2px-ol	974								2px-ol	975
	uncnt 61									uncnt 63
2px-ol-ilm	816								2px-ol-ilm	827
	uncnt 20									uncnt 22
Putirka (2008) RiMG													SiO2	TiO2	Al2O3	FeO	MnO	MgO	CaO	Na2O	K2O	Cr2O3
Eqn 36												c	51.608	0.387	2.169	4.752	0.121	15.93	22.978	0.408	0	0.22		891.395
T(C )												c	51.075	0.655	2.673	5.254	0.192	16.549	22.82	0.269	0.008	0.196		930.778
	949.547									949.302		c	50.723	0.451	2.879	4.908	0.133	16.967	22.507	0.335	0.003	0.609		1003
												c	50.876	0.424	3.143	4.78	0.136	16.595	22.687	0.292	0	0.791		1038.07
												c	52.543	0.333	1.583	4.83	0.1	16.644	22.943	0.4	0.002	0.168		917.335
																								956.116
																								55.2265
												o	54.187	0.151	1.408	11.184	0.24	30.27	0.915	0.041	0	0.104
												o	54.05	0.441	1.873	11.396	0.352	29.979	1.113	0.017	0	0.102
												o	54.544	0.247	1.179	11.24	0.146	29.864	1.405	0.02	0	0.102
												o	54.734	0.288	1.183	10.372	0.245	29.147	2.785	0.071	0	0.135
												o	55.072	0.281	1.673	10.569	0.227	30.094	1.051	0.023	0	0.171

## Sheet: at15
T=929												3	10	15	16	95	96	61	62	66	51
								cpx-av	opx-av			at15 2-43	at15 2-50	at15 3-41	at15 3-42	at15 3-5	at15 3-6	at15 2-11	at15 2-12	at15 2-16	at15 2-1
	cpx av		opx av		ol av			rim	rim							opx	cpx	opx	cpx	opx	cpx
SiO2	51.2623		54.1772		38.7047			51.6785	54.3996			55.456	51.517	55.302	53.104	54.15	52.234	53.598	51.068	54.793	51.274
TiO2	0.49169		0.4334		0.0137083			0.411833	0.383071			0.244	0.332	0.396	0.286	0.381	0.391	0.557	0.624	0.312	0.556
Al2O3	2.52579		1.4558		0.00758333			2.53172	1.44643			1.119	2.796	1.118	1.951	1.414	1.274	1.803	2.299	0.889	2.427
Cr2O3	0.384793		0.127		0.00883333			0.413667	0.108357			0.126	0.396	0.122	0.197	0.08	0.137	0.152	0.194	0.084	0.33
FeO	5.05379		11.4144		18.6299			4.8625	11.3396			11.179	4.909	11.625	4.71	11.748	4.531	11.546	5.448	11.424	5.09
MnO	0.137103		0.2824		0.280958			0.141778	0.271			0.315	0.139	0.206	0.186	0.234	0.165	0.296	0.159	0.335	0.105
NiO	0.0150345		0.0212		0.048875			0.0151667	0.0276429			0.038	0	0	0	0	0.008	0.027	0.044	0.006	0
MgO	16.5472		30.251		41.7639			16.629	30.2026			30.893	17.153	30.078	16.797	30.224	16.866	30.405	16.854	30.493	16.117
CaO	23.2131		1.1208		0.0808333			23.0405	1.03371			0.882	22.832	0.987	23.571	1.021	23.897	1.115	23.239	1.194	23.556
Na2O	0.292448		0.0172		0.00466667			0.268833	0.018			0.02	0.305	0.015	0.203	0	0.167	0.015	0.353	0.049	0.311
K2O	0.00206897		0.0018		0.00129167			0.00205556	0.00214286			0	0.004	0	0	0	0.004	0.006	0.004	0	0
Total	100.023		99.4088		99.6227			100.059	99.2925			100.289	100.433	99.884	101.041	99.339	99.674	99.616	100.413	99.687	99.888
	T (K)							T (K)					T (K)		T (K)		T (K)		T (K)		T (K)
T(BKN)	1049.77							1092.88					1125.81		1071.51		954.425		1029.94		968.695
	T(C)							T(C)					T(C)		T(C)		T(C)		T(C)		T(C)
	776.623							819.73					852.66		798.362		681.275		756.789		695.545
	T(K)							T(K)					T(K)		T(K)		T(K)		T(K)		T(K)
T(Ca/opx)	1340.12							1318.59					1275.52		1304.89		1315.85		1338.7		1356.49
	T(C)							T(C)					T(C)		T(C)		T(C)		T(C)		T(C)
	1066.97							1045.44					1002.37		1031.74		1042.7		1065.55		1083.34
T(Na/opx/cpx)	T(K)							T(K)					T(K)		T(K)		T(K)		T(K)		T(K)
	1271.17							1305.69					1297.93		1332.94		#NUM!		1187.82		1524.67
	T(C)							T(C)					T(C)		T(C)		T(C)		T(C)		T(C)
	998.021							1032.54					1024.78		1059.79		#NUM!		914.671		1251.52
QUILF							QUILF
2px	1049						2px	1022
	uncnt 4							uncnt 3
2px-ol	947						2px-ol	941
	uncnt 36							uncnt 29
Putirka (2008) RiMG
Eqn 36
T(C )
	928.832							929.48

## Sheet: at18
T=943											No.	24	25	26	27	29	30	31	32	39	40	46	47
	av all cpx		av all opx		av ol			av cpx	av opx		Comment	at18 3-59	at18 3-60	at18 3-61	at18 3-62	at18 6-1	at18 6-2	at18 6-3	at18 6-4	at18 6-11	at18 6-12	at18 6-18	at18 6-19
								rim	rim
SiO2	51.648		54.5367		38.3515			51.7851	54.6261		SiO2	53.654	55.131	51.886	54.786	51.748	54.821	51.653	54.721	52.071	55.079	54.751	51.784
TiO2	0.365667		0.33225		0.0360909			0.660857	0.357429		TiO2	0.19	0.082	0.873	0.063	0.854	0.392	0.777	0.391	0.432	0.467	0.28	0.755
Al2O3	1.93		1.46119		0.00733333			2.52886	1.47157		Al2O3	0.73	1.142	2.803	1.311	2.741	1.434	2.653	1.386	2.534	1.258	1.646	2.652
Cr2O3	0.102367		0.0418125		0.0106667			0.0951429	0.0452857		Cr2O3	0.023	0.081	0.138	0	0.038	0.12	0.11	0.05	0.095	0.068	0.02	0.102
FeO	5.63627		12.9321		21.1949			5.87464	12.8197		FeO	4.661	13.397	6.245	13.381	5.994	12.655	6.225	13.068	5.605	12.483	12.684	5.965
MnO	0.155967		0.28625		0.316091			0.141357	0.280786		MnO	0.179	0.275	0.136	0.29	0.171	0.279	0.175	0.288	0.118	0.337	0.25	0.124
NiO	0.0156667		0.024375		0.0205758			0.0100714	0.0235		NiO	0.016	0	0.01	0.072	0	0	0	0.042	0.027	0	0	0
MgO	16.3678		28.9946		39.863			16.1905	28.9711		MgO	15.59	29.634	16.266	28.714	16.299	29.056	16.394	29.248	16.456	29.041	29.208	15.973
CaO	23.4404		1.061		0.0695152			21.9584	1.06879		CaO	25.488	0.719	22.129	0.797	21.254	1.187	22.499	1.245	21.702	1.239	1.024	22.252
Na2O	0.252333		0.0183125		0.00657576			0.2875	0.0192857		Na2O	0.146	0.049	0.299	0.062	0.329	0	0.25	0.012	0.276	0.012	0	0.343
K2O	0.00206667		0.00175		0.0010303			0.00171429	0.002		K2O	0	0	0.002	0.006	0	0	0	0.006	0	0	0.005	0.004
Total	99.9946		99.732		99.9855			99.5634	99.7191		Total	100.723	100.535	100.843	99.544	99.511	99.975	100.752	100.457	99.32	100.062	99.924	99.964
	T (K)							T (K)
T(BKN)	1000.07							1186.65
	T(C)							T(C)
	726.921							913.5
	T(K)							T(K)
T(Ca/opx)	1325.85							1327.59
	T(C)							T(C)
	1052.7							1054.44
T(Na/opx/cpx)	T(K)							T(K)
	1325.82							1305.24
	T(C)							T(C)
	1052.67							1032.09
QUILF							QUILF
2px	1007						2px	1006
	uncnt 1							uncnt 1
2px-ol	913						2px-ol	911
	uncnt 31							uncnt 31
Putirka (2008) RiMG
Eqn 36
T(C )
	908.826							943.01

## Sheet: at20
T=915											No.	41	42	19	20	25	26	33	34	29	30	35	36
							av-cpx	av-opx			Comment	at20 3-1	at20 3-2	at20 3-1+ 4	at20 3-1+ 5	at20 3-1+ 10	at20 3-1+ 11	at20 8-5	at20 8-6	at20 8r-2	at20 8r-3	at20 8r-8	at20 8r-9
	av-all cpx		av-all opx		a-all ol		rim	rim				opx	cpx
SiO2	51.6323		54.1955		37.9411		51.8996	54.3969			SiO2	54.238	51.478	54.327	51.354	53.996	51.755	54.472	50.805	54.703	52.301	54.174	52.325
TiO2	0.271606		0.137414		0.0278846		0.229857	0.135174			TiO2	0.04	0.337	0	0.034	0.227	0.212	0.084	0.235	0.214	0.144	0.169	0.198
Al2O3	1.88997		1.28734		0.00869231		1.78386	1.25652			Al2O3	1.069	2.089	1.146	1.598	1.053	1.637	1.297	2.465	1.446	2.062	1.333	1.285
Cr2O3	0.0536364		0.0332414		0.0152692		0.0649048	0.0398261			Cr2O3	0.065	0.116	0.091	0	0	0.059	0	0.052	0.047	0.102	0.047	0.08
FeO	5.93336		13.313		21.8055		5.86276	13.3881			FeO	13.631	6.167	14.207	5.907	13.707	6.085	13.205	6.436	13.326	5.596	13.648	5.882
MnO	0.180818		0.297931		0.335192		0.177381	0.314348			MnO	0.268	0.199	0.33	0.186	0.325	0.264	0.401	0.136	0.261	0.149	0.286	0.271
NiO	0.0188485		0.0162069		0.0161154		0.0145714	0.0146957			NiO	0	0	0	0.037	0	0.053	0	0	0.049	0	0	0.022
MgO	16.0653		28.8038		39.577		16.1255	28.7296			MgO	29.046	16.353	28.972	16.164	28.636	16.105	28.872	16.157	28.675	16.043	28.005	16.273
CaO	22.9573		0.950069		0.0695769		22.7839	0.952913			CaO	0.898	23.142	0.936	23.406	0.958	23.541	0.901	23.218	0.966	22.559	1.043	21.624
Na2O	0.272394		0.0185172		0.00369231		0.269762	0.0203478			Na2O	0	0.27	0.026	0.361	0.044	0.306	0.034	0.15	0.009	0.274	0.043	0.272
K2O	0.0019697		0.00186207		0.00115385		0.00119048	0.00295652			K2O	0.003	0.001	0.002	0.002	0	0.001	0	0	0	0.004	0.001	0.002
Total	99.3476		99.1313		99.8941		99.2828	99.3225			Total	99.503	100.227	100.078	99.104	99.145	100.026	99.279	99.749	99.768	99.252	98.776	98.241
	T (K)						T (K)						T (K)		T (K)		T (K)		T (K)		T (K)		T (K)
T(BKN)	1048.04						1075.83						1041.75		902.659		946.379		1040.05		1114.4		1183.84
	T(C)						T(C)						T(C)		T(C)		T(C)		T(C)		T(C)		T(C)
	774.887						802.682						768.604		629.509		673.229		766.902		841.247		910.686
	T(K)						T(K)						T(K)		T(K)		T(K)		T(K)		T(K)		T(K)
T(Ca/opx)	1299.52						1299.79						1285.29		1294.44		1302.53		1285.53		1301.83		1324.64
	T(C)						T(C)						T(C)		T(C)		T(C)		T(C)		T(C)		T(C)
	1026.37						1026.64						1012.14		1021.29		1029.38		1012.38		1028.68		1051.49
T(Na/opx/cpx)	T(K)						T(K)						T(K)		T(K)		T(K)		T(K)		T(K)		T(K)
	1309.25						1336.23						#NUM!		1321.73		1505.47		1610.85		1123.14		1526.83
	T(C)						T(C)						T(C)		T(C)		T(C)		T(C)		T(C)		T(C)
	1036.1						1063.08						#NUM!		1048.58		1232.32		1337.7		849.993		1253.68
QUILF						QUILF
2px	980					2px	980
	uncnt 3						uncnt 3
2px-ol	904					2px-ol	904
	uncnt 26						uncnt 26
Putirka (2008) RiMG
Eqn 36
T(C )
	913.503						914.9

## Sheet: at21
T=931												12	16	55	56	57	58	59	60
								av	av			at21 3r-2	at21 3r-6	at21 4r-9	at21 4r-10	at21 5-1	at21 5-2	at21 5-3	at21 5-4
	av-all cpx		av-all-opx		av-all ol			rim	rim
SiO2	51.8418		54.4082		38.2403			52.2293	54.6878			55.113	51.534	54.473	51.826	54.694	52.057	54.328	52.552
TiO2	0.275062		0.129286		0.02275			0.270615	0.207583			0.037	0.515	0.098	0.303	0.222	0.592	0.377	0.179
Al2O3	1.95		1.39146		0.00604167			1.912	1.30067			0.876	2.188	1.497	2.219	1.28	2.026	1.237	1.781
Cr2O3	0.044875		0.0202857		0.0101458			0.0613846	0.0226667			0.098	0.029	0	0.047	0.007	0.026	0.034	0.191
FeO	5.71287		13.009		21.0602			5.73654	13.0698			12.992	5.626	13.101	5.861	12.893	5.676	12.777	5.659
MnO	0.181844		0.300464		0.330854			0.187846	0.299333			0.269	0.188	0.281	0.19	0.381	0.162	0.264	0.213
NiO	0.0157188		0.00896429		0.00672917			0.0111538	0.00808333			0	0.057	0	0.024	0	0.002	0.033	0
MgO	16.1824		28.8296		39.788			16.1879	28.9318			28.676	15.886	29.082	16.104	29.288	16.217	29.494	16.224
CaO	22.4827		0.927071		0.0713333			21.9865	0.943			0.875	22.419	0.882	21.398	1.014	22.85	1.034	21.701
Na2O	0.2895		0.0225357		0.00554167			0.292385	0.019			0.02	0.298	0.015	0.341	0.018	0.315	0.022	0.271
K2O	0.0036875		0.00114286		0.0015			0.00223077	0.000833333			0	0	0	0.008	0	0	0.005	0.002
Total	99.046		99.1037		99.6451			98.9188	99.5347			98.961	98.809	99.466	98.39	99.884	99.937	99.664	98.815
	T (K)							T (K)					T (K)		T (K)		T (K)		T (K)
T(BKN)	1110.97							1168.11					1109.36		1204.15		1087.67		1204.12
	T(C)							T(C)					T(C)		T(C)		T(C)		T(C)
	837.824							894.964					836.212		931.002		814.518		930.974
	T(K)							T(K)					T(K)		T(K)		T(K)		T(K)
T(Ca/opx)	1292.85							1296.02					1278.39		1279.61		1313.73		1319.38
	T(C)							T(C)					T(C)		T(C)		T(C)		T(C)
	1019.7							1022.87					1005.24		1006.46		1040.58		1046.23
T(Na/opx/cpx)	T(K)							T(K)					T(K)		T(K)		T(K)		T(K)
	1344.28							1296.16					1304.57		1194.33		1263.82		1354.49
	T(C)							T(C)					T(C)		T(C)		T(C)		T(C)
	1071.13							1023.01					1031.42		921.179		990.67		1081.34
QUILF
2px	973							973
	uncnt 1							uncnt 0
2px-ol	904							904
	uncnt 24							uncnt 23
2px-ol-ilm
Putirka (2008) RiMG
Eqn 36
T(C )
	923.23							930.99

## Sheet: at24
T=923												67	70	73	74	77	78
												at24 1-1	at24 1-4	at24 1-7	at24 1-8	at24 1-11	at24 1-12
	av-all cpx		av-all opx		av-all ol			rim	rim
SiO2	51.6641		54.5209		38.5165			51.1972	54.2425			54.671	53.214	54.599	51.687	54.538	51.735
TiO2	0.427738		0.231813		0.0197429			0.540167	0.213846			0.064	0.141	0.385	0.401	0.276	0.374
Al2O3	2.2334		1.28622		0.00574286			2.29789	1.21708			0.776	1.131	1.67	2.906	1.266	2.741
Cr2O3	0.199714		0.079625		0.00794286			0.183278	0.0678462			0.002	0.066	0.151	0.404	0.093	0.345
FeO	5.25136		11.9905		19.7373			5.39039	12.151			12.157	4.781	12.36	5.516	12.045	5.23
MnO	0.147048		0.282562		0.296429			0.157333	0.296923			0.239	0.084	0.299	0.115	0.33	0.139
NiO	0.012		0.0140303		0.0258			0.0136667	0.0323077			0	0.019	0.014	0	0.006	0.006
MgO	16.3955		29.618		40.9045			16.2624	29.5227			29.98	16.709	29.171	16.626	30.002	16.87
CaO	22.7236		1.00337		0.0618			22.8033	1.01369			0.879	23.52	1.005	22.009	0.894	21.867
Na2O	0.273738		0.0127813		0.00274286			0.3155	0.0107692			0.017	0.201	0.007	0.277	0.031	0.282
K2O	0.00140476		0.00178125		0.00131429			0.00116667	0.00230769			0.008	0.002	0	0.006	0	0
Total	99.3933		99.1113		99.6624			99.2349	98.8488			98.836	100.022	99.695	99.966	99.534	99.601
	T (K)							T (K)					T (K)		T (K)		T (K)
T(BKN)	1106.45							1072.19					1034.35		1196.92		1209.13
	T(C)							T(C)					T(C)		T(C)		T(C)
	833.301							799.042					761.201		923.767		935.979
	T(K)							T(K)					T(K)		T(K)		T(K)
T(Ca/opx)	1311.92							1315.63					1279.38		1311.11		1281.95
	T(C)							T(C)					T(C)		T(C)		T(C)
	1038.77							1042.48					1006.23		1037.96		1008.8
T(Na/opx/cpx)	T(K)							T(K)					T(K)		T(K)		T(K)
	1211.52							1133.01					1369.1		1061.29		1435.11
	T(C)							T(C)					T(C)		T(C)		T(C)
	938.37							859.865					1095.95		788.145		1161.96
QUILF							QUILF
2px	1000						2px	1009
	uncnt 2							uncnt 1
2px-ol	889						2px-ol	892
	uncnt 37							uncnt 39
2px-ol-ilm
Putirka (2008) RiMG
Eqn 36
T(C )
	924.908							923.383

## Sheet: at40
T=921												86	87	26	25	9	10
												at40 7-13	at40 7-14	at40 3-19	at40 3-18	at40 1-27	at40 1-28
	av-all-cpx		av-all opx		av-all ol			av	av			cpx	opx
SiO2	52.2605		54.3753		38.2079			52.2669	54.4347			50.846	54.546	52.307	55.275	53.38	54.584
TiO2	0.3651		0.247844		0.0156875			0.419571	0.329778			0.441	0.244	0.373	0.07	0.277	0.182
Al2O3	2.11927		1.41288		0.00453125			2.00371	1.46611			3.043	1.096	2.352	1.29	1.738	1.186
Cr2O3	0.214767		0.0777813		0.0151875			0.175857	0.0846667			0.811	0.083	0.267	0.021	0.022	0.137
FeO	5.52093		13.3971		21.6503			5.60757	13.1352			4.281	13.36	5.537	13.485	5.602	14.089
MnO	0.164		0.307562		0.325062			0.173571	0.301111			0.111	0.29	0.171	0.253	0.12	0.303
NiO	0.0142857		0.0102188		0.0216875			0.0115714	0.0158889			0	0.028	0.016	0	0	0
MgO	16.2201		28.5442		39.6089			16.1739	28.6318			16.169	29.112	15.97	28.862	16.567	28.781
CaO	22.6098		1.08097		0.0683125			22.3777	1.11978			23.162	1.162	22.488	0.895	22.411	0.941
Na2O	0.2823		0.013625		0.00109375			0.276286	0.0168889			0.333	0	0.264	0.029	0.226	0
K2O	0.001		0.0010625		0.0005			0.000571429	0.000222222			0.002	0	0.001	0.001	0	0
Total	99.8377		99.5228		99.9996			99.5566	99.584			99.205	100.032	99.842	100.22	100.381	100.227
	T (K)							T (K)				T (K)		T (K)		T (K)
T(BKN)	1119.74							1143.13				1012.17		1136.52		1164.98
	T(C)							T(C)				T(C)		T(C)		T(C)
	846.587							869.977				739.023		863.369		891.829
	T(K)							T(K)				T(K)		T(K)		T(K)
T(Ca/opx)	1331.96							1340.89				1350.31		1281.42		1295.05
	T(C)							T(C)				T(C)		T(C)		T(C)
	1058.81							1067.74				1077.16		1008.27		1021.9
T(Na/opx/cpx)	T(K)							T(K)				T(K)		T(K)		T(K)
	1221.79							1281.82				#NUM!		1434		#NUM!
	T(C)							T(C)				T(C)		T(C)		T(C)
	948.642							1008.67				#NUM!		1160.85		#NUM!
QUILF							QUILF
2px	997						2px	1003
	uncnt 13							uncnt 18
2px-ol	901						2px-ol	900
	uncnt 31							uncnt 33
2px-ol-ilm
Putirka (2008) RiMG
Eqn 36
T(C )
	918.552							921.147

## Sheet: fig
	AT11	AT15	AT18	AT20	AT21	AT24	AT40			AT11		AT15	AT18	AT20	AT21	AT24	AT40
Putirka	949	929	943	914	931	923	921		Putirk	949		929	943	914	931	923	921
QUILF	974	941	911	904	904	892	900		QUILF	974		941	911	904	904	892	900
T(BKN)	863.077	819.73	913.5	802.682	894.964	799.042	869.977		TNa-Brey&Kohler	1034		1032	1032	1063	1023	859	1008
T(Ca/opx)	1063.89	1045.44	1054.44	1026.64	1022.87	1042.48	1067.74
T(Na/opx/cpx)	1034.21	1032.54	1032.09	1063.08	1023.01	859.865	1008.67
error
Putirk	55
QUILF	63
T(BKN)	46.8562
T(Ca/opx)	121.561
T(Na/opx/cpx)	134.137
